# Supplementary material for: Aerosol light absorption and the role of extremely low volatility organic compounds
Source: Copernicus journal article supplement (doi:10.5194/acp-2019-1191), 2020-01-20
Supplement: Supplementary file 1 [file acp-2019-1191-supplement.pdf]

## Supplemental Information

### Aerosol light absorption and the role of ELVOCs in the Eastern Mediterranean

Antonios Tasoglou<sup>1,5</sup>, Evangelos Louvaris<sup>2,3</sup>, Kalliopi Florou<sup>2,3</sup>, Aikaterini Liangou<sup>2,3</sup>, Eleni Karnezi<sup>1</sup>, Christos Kaltsonoudis<sup>4</sup>, Ningxin Wang<sup>1</sup>, Spyros N. Pandis<sup>1,2,3</sup>

<sup>1</sup>Department of Chemical Engineering, Carnegie Mellon University, Pittsburgh

<sup>2</sup>Department of Chemical Engineering, University of Patras, Patras, Greece

<sup>3</sup> Institute of Chemical Engineering Sciences (ICE-HT), FORTH, Patras, Greece

<sup>4</sup>Department of Mechanical Engineering, Carnegie Mellon University, Pittsburgh, United States

<sup>5</sup>RJ Lee Group, Inc., Monroeville, United States

#### S1. Data analysis of TD measurements

The OA MFR is the ratio of OA concentration remaining after passing through the TD over the ambient OA concentration passing through the bypass line. The ambient OA concentrations were corrected for the AMS particle collection efficiency ( $CE_{amb}$ ) calculated by the algorithm of Kostenidou et al. (2007). The average  $CE_{amb}$  value for the entire campaign was 0.64. The thermodenuded OA concentration was also corrected for the corresponding TD AMS collection efficiency ( $CE_{TD}$ ) which was higher from the ambient and equal to 0.79 on average.

Figure S1 shows the collection efficiency-corrected ambient and TD OA mass concentrations. The TD temperature time series of the entire campaign is also shown. The ambient OA concentration was quite variable ranging from 0.25 to 2.5  $\mu\text{g m}^{-3}$ . The average ambient OA concentration observed during this campaign (1.2  $\mu\text{g m}^{-3}$ ) was almost half of that during May 2008 in FAME-08 (Hildebrandt et al., 2010).

The MFR calculation assumes implicitly that the OA concentration remains constant during the measurement period. If two consecutive OA ambient mass concentrations differed by more than 25% the corresponding MFR was not included in the analysis. Also, in order to ensure that the temperature remained constant between two consecutive TD samples, the absolute

difference between the two samples had to be less than 5 °C. If this difference for a TD sample was higher, then the sample was not included in our analysis.

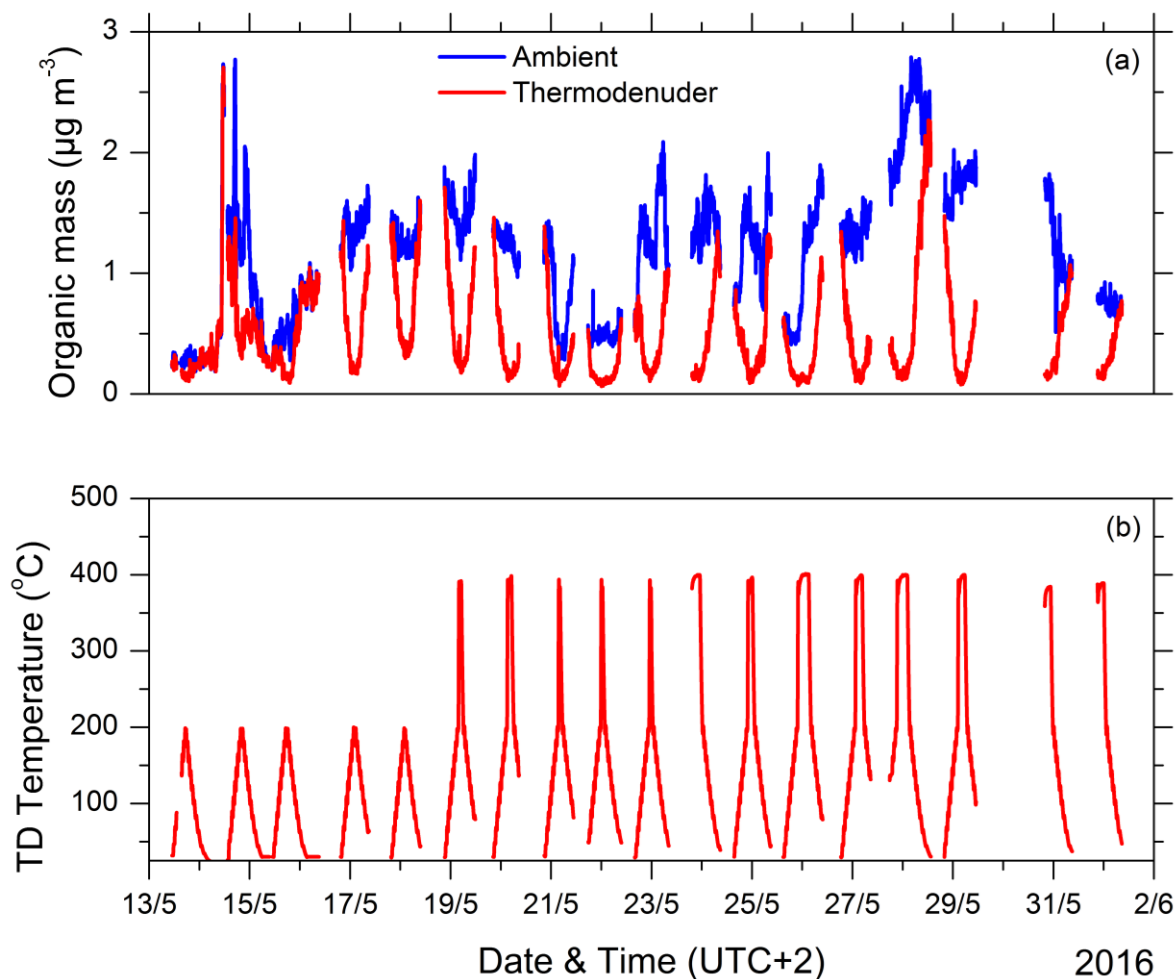

**Figure S1:** (a) Time series of the total ambient (blue line) and total thermodenuded (red line) OA mass concentration. (b) TD temperature during the measurement period.

The same quality control approach was used also for the factors resulting from the PMF analysis of the AMS spectra. However, in this case a minimum concentration threshold of 0.1  $\mu\text{g m}^{-3}$  was used for the ambient concentrations together with the criterion of the stability of the ambient concentrations during the sampling period. MFR values corresponding to concentrations of the PMF factors below this threshold were eliminated from the analysis. These criteria still allowed us to use approximately 70% of the measured values. In the present work we analyzed the complete datasets together averaging the corresponding results.

The MFR values were corrected for particle losses in the TD. These number losses inside the TD are due to diffusion of the smaller particles to the walls, or deposition of the larger particles on the TD walls, and thermophoretic losses due to temperature differences (Burtcher et al., 2001). To account for these losses, sample flow rate as well as size- and temperature-dependent loss corrections were applied following Louvaris et al. (2017) corresponding to the operating conditions during the campaign. The final step of the data analysis was to average the corrected for CE and TD losses MFR data based on temperature bins of 10°C.

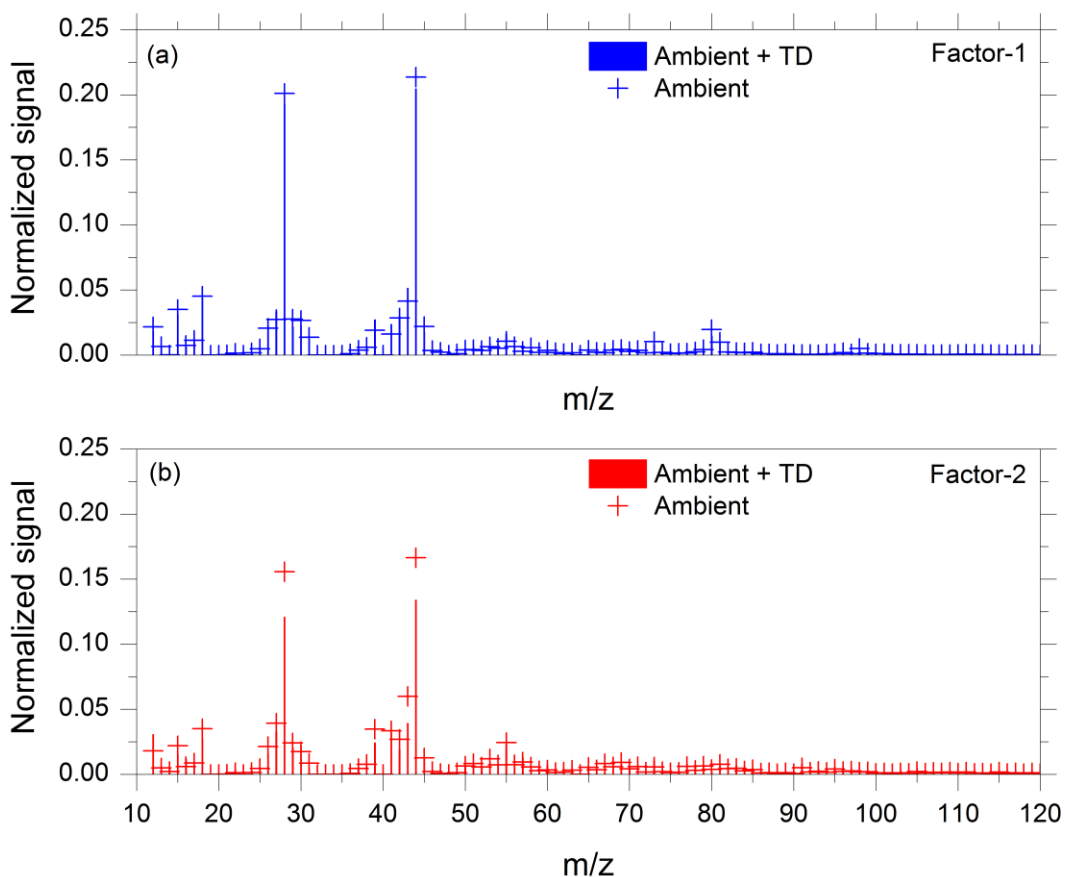

**Figure S2:** (a) Comparison of mass spectra of ambient OA PMF factor 1 analysis (crosses) and ambient plus thermodenuder PMF analysis (bars). (b) Comparison of mass spectra of ambient OA PMF factor 1 analysis (crosses) and ambient plus thermodenuder PMF analysis (bars).

Source apportionment of the OA was performed for the combined ambient and thermodenuded AMS spectra. This analysis was repeated by using only the ambient data, resulting in the same factors as for the complete dataset. Detailed analysis for the ambient organic components can be found in Florou et al. (in prep.). Kostenidou et al. (2009) proposed the theta

angle ( $\theta$ ) as an indicator of mass spectra similarity by treating the AMS spectra as vectors and calculating their corresponding angle. Lower  $\theta$  implies more similar spectra. Comparing the results of the PMF of only the ambient data and of the ambient plus TD spectra, the resulting angles were  $4^\circ$  for Factor 1 and  $8^\circ$  for Factor 2 suggesting that the ambient plus TD PMF analysis gave for all practical purposes the same factors as the ambient-only OA analysis. The ambient and TD mass spectra of the two factors are shown in Figure S2.

## **S2. Sensitivity analysis for the TD model**

Sensitivity tests were performed in order to evaluate the behavior of the calculated volatility distributions to changes in the accommodation coefficient ( $a_m$ ) and the effective vaporization enthalpy ( $\Delta H_{\text{vap}}$ ). First, the sensitivity of the volatility distributions to the accommodation coefficient were investigated using values ranging between 0.01 and 1. Both the volatility distribution and the effective vaporization enthalpy were recalculated, and the results were compared to the base case. The changes in the volatility distribution and the accommodation coefficient were also studied when the effective vaporization enthalpy ranged from  $50 \text{ kJ mol}^{-1}$  to  $100 \text{ kJ mol}^{-1}$ . The same sensitivity analysis was also performed for the volatility distributions of each PMF factor.

The measured and the predicted thermograms during the sensitivity tests to  $a_m$  are shown in Figure S3. When the  $a_m$  was reduced to 0.01, the mass transfer resistances during the OA evaporation increased. In this case we assume a slower OA evaporation compared to the rest of the cases with  $a_m=0.1$ ,  $a_m=1$  or  $a_m=0.27$  (base case). The changes in the estimated volatility distributions were modest. A decrease of  $a_m$  resulted in general in a small increase of the estimated SVOC content. The estimated  $\Delta H_{\text{vap}}$  values were  $100$ ,  $88 \pm 14$ , and  $70 \pm 19 \text{ kJ mol}^{-1}$  for the cases of  $a_m=0.01$ ,  $0.1$ , and  $1.0$  respectively compared to the  $80 \pm 20 \text{ kJ mol}^{-1}$  for the base case.

Figure S4 shows the predicted thermograms for  $\Delta H_{\text{vap}}$  of  $50$  and  $100 \text{ kJ mol}^{-1}$ . For the reported base case,  $\Delta H_{\text{vap}}$  was  $80 \pm 20 \text{ kJ mol}^{-1}$ . The predicted thermograms for  $\Delta H_{\text{vap}}$  of  $50$  and  $100 \text{ kJ mol}^{-1}$  reproduce the experimental observations relatively well, but with higher error than the base case model results. The differences for these cases are more pronounced for temperatures between  $150^\circ\text{C}$  and  $200^\circ\text{C}$ . Once again modest changes were found in the estimated volatility distributions when  $\Delta H_{\text{vap}}$  varied from  $50 \text{ kJ mol}^{-1}$  to  $100 \text{ kJ mol}^{-1}$ . The  $\Delta H_{\text{vap}}$  decrease to  $50 \text{ kJ}$

84  $\text{mol}^{-1}$  resulted in a corresponding increase of SVOCs by almost 15%. The estimated  $a_m$  showed  
 85 little variability compared to the base case value of 0.27.

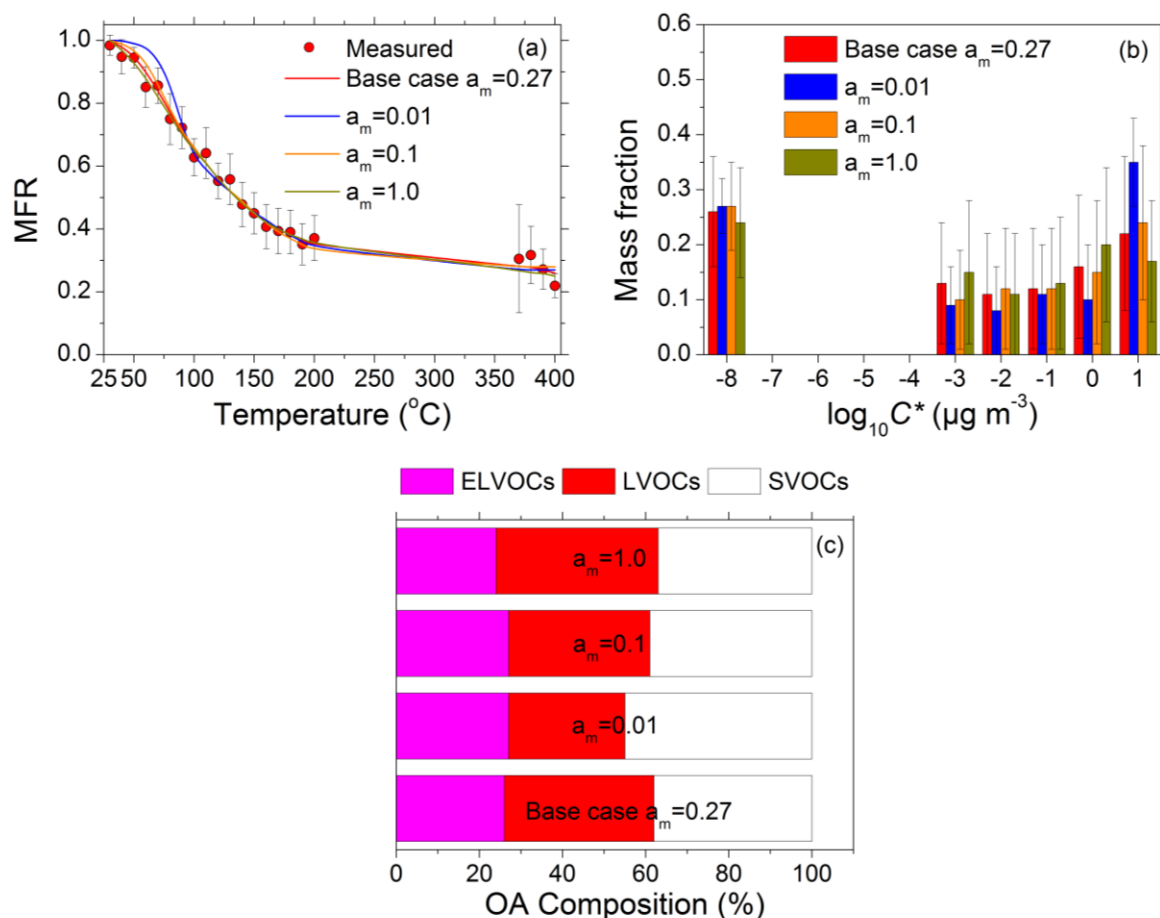

**Figure S3:** (a) Measured (red circles) and predicted thermograms for the base case (red line),  $a_m = 0.01$  (blue line),  $a_m = 0.1$  (orange line), and  $a_m = 1.0$  (dark yellow line) for total OA FAME-16 according to the model of Karnezi et al. (2014). The error bars represent  $\pm 2$  standard deviations of the mean. (b) Estimated OA volatility distributions for the base case and the sensitivity tests to different  $a_m$  values along with their corresponding uncertainties ( $\pm 1$  standard deviation of the mean) according to the model of Karnezi et al. (2014). (c) OA composition for the different  $a_m$  values. ELVOCs are in magenta, LVOCs in red and SVOCs in white.

86  
 87 The changes in the volatility distributions for the two-factor solution obtained from the  
 88 PMF analysis (MO-OOA and LO-OOA) are summarized in Figures S5 and S6. For the MO-OOA  
 89 factor, when  $a_m$  was reduced to 0.01 mass transfer resistances during the evaporation increased  
 90 resulting in slower evaporation of MO-OOA. The predicted thermograms were quite similar in all

cases (Figure S5). The estimated vaporization enthalpy increased to 147 kJ mol<sup>-1</sup> for  $a_m$  equal to 0.01 and 106 kJ mol<sup>-1</sup> for  $a_m$  equal to 0.1 compared to the base case value of 89 kJ mol<sup>-1</sup>.

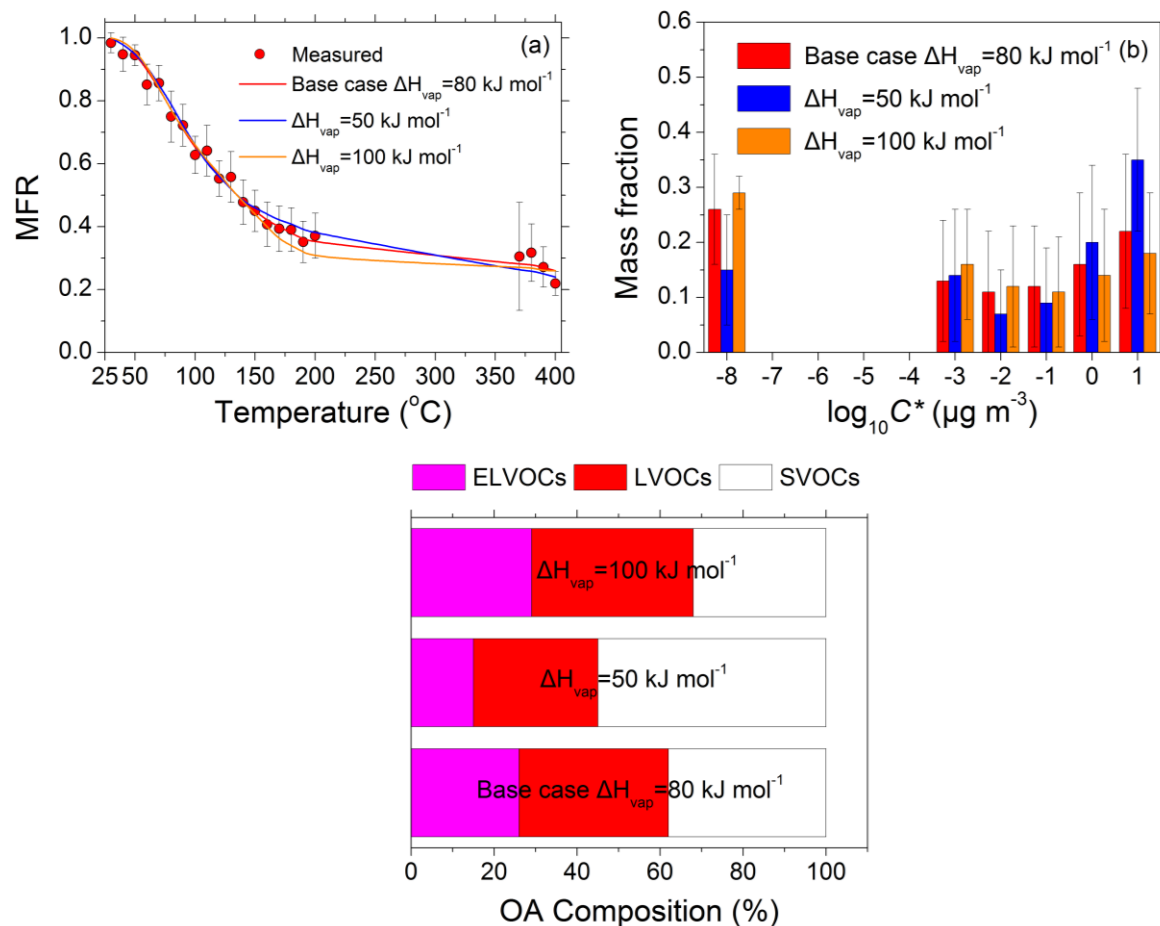

**Figure S4:** (a) Measured (red circles) and predicted thermograms for the base case (red line),  $\Delta H_{vap} = 50$  kJ mol<sup>-1</sup> (blue line) and  $\Delta H_{vap} = 100$  kJ mol<sup>-1</sup> (orange line) for total OA FAME-16 according to the model of Karnezi et al. (2014). The error bars represent  $\pm 2$  standard deviations of mean. (b) Estimated OA volatility distributions for the base case and the sensitivity tests to different  $\Delta H_{vap}$  values along with their corresponding uncertainties ( $\pm 1$  standard deviation of the mean) according to the model of Karnezi et al. (2014). (c) OA composition for the different  $\Delta H_{vap}$  values. ELVOCs are in magenta, LVOCs in red and SVOCs in white.

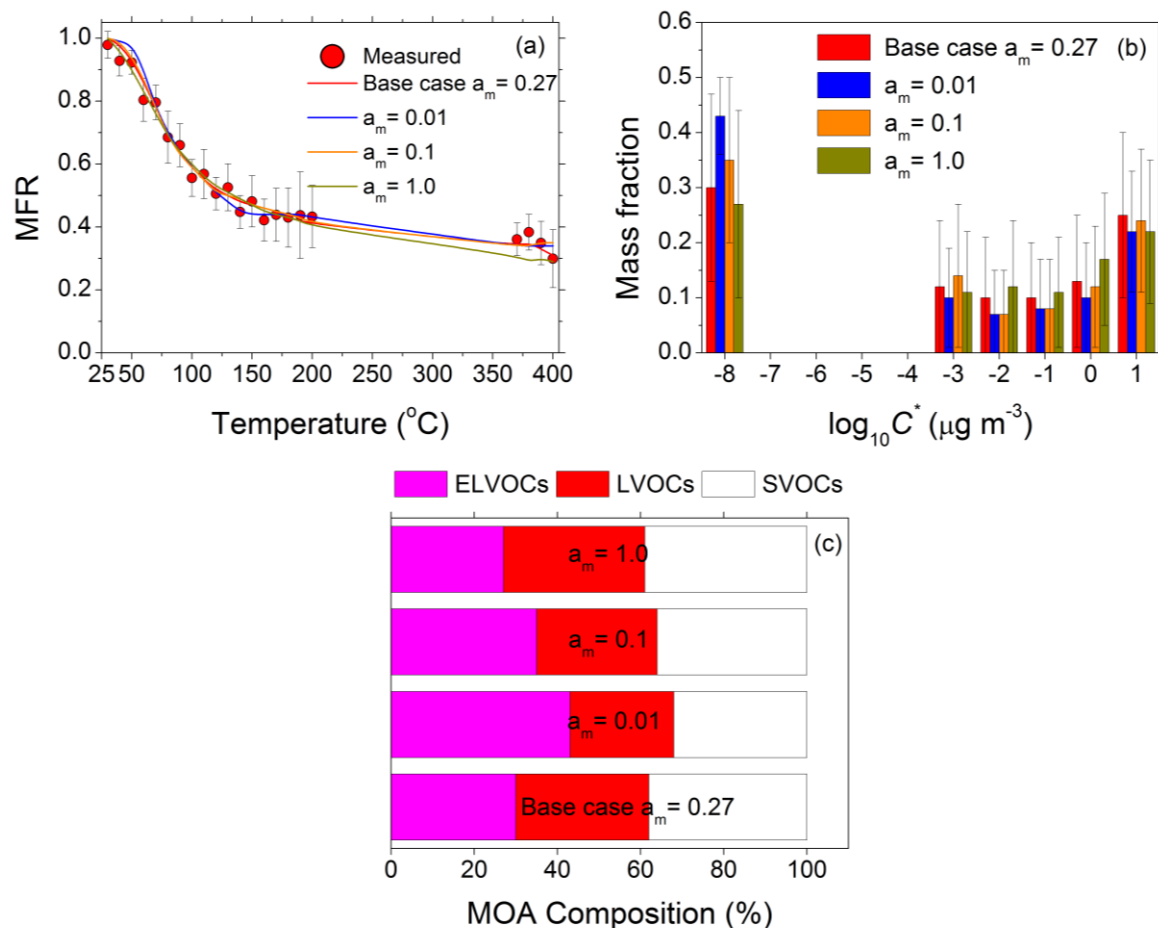

**Figure S5:** (a) Measured (red circles) and predicted thermograms for the base case (red line),  $a_m=0.01$  (blue line),  $a_m=0.1$  (orange line), and  $a_m=1.0$  (dark yellow line) for MO-OOA FAME-16 according to the model of Karnezi et al. (2014). The error bars represent  $\pm 2$  standard deviations of the mean. (b) Estimated MO-OOA volatility distributions for the base case and the sensitivity tests to different  $a_m$  values along with their corresponding uncertainties ( $\pm 1$  standard deviation of the mean) according to the model of Karnezi et al. (2014). (c) MO-OOA composition for the different  $a_m$  values. ELVOCs are in magenta, LVOCs in red and SVOCs in white.

Increasing the  $a_m$  to unity the vaporization enthalpy decreased to  $71 \text{ kJ mol}^{-1}$ . Its volatility distribution did not change significantly when  $a_m$  ranged from 0.01 to 1.0. The changes in the MO-OOA composition were modest for changing the  $a_m$  from 0.1 and 1.0 compared to the base case results. Only for the case of  $a_m$  equal to 0.01 the LVOC and ELVOC contents decreased and increased respectively by 10%. The same behavior was also obtained for the LO-OOA factor during the same test (Figure S6). The volatility distribution did not change significantly, when  $a_m$  was varied from 0.01 to unity. Its  $\Delta H_{\text{vap}}$  increased also when  $a_m$  decreased to 0.01 compared to the

base case value ( $67 \text{ kJ mol}^{-1}$ ). However,  $\Delta H_{\text{vap}}$  remained almost constant for  $a_m$  equal to 0.1 and increased for  $a_m$  equal to unity. The LO-OOA composition remained similar during the  $a_m$  changes.

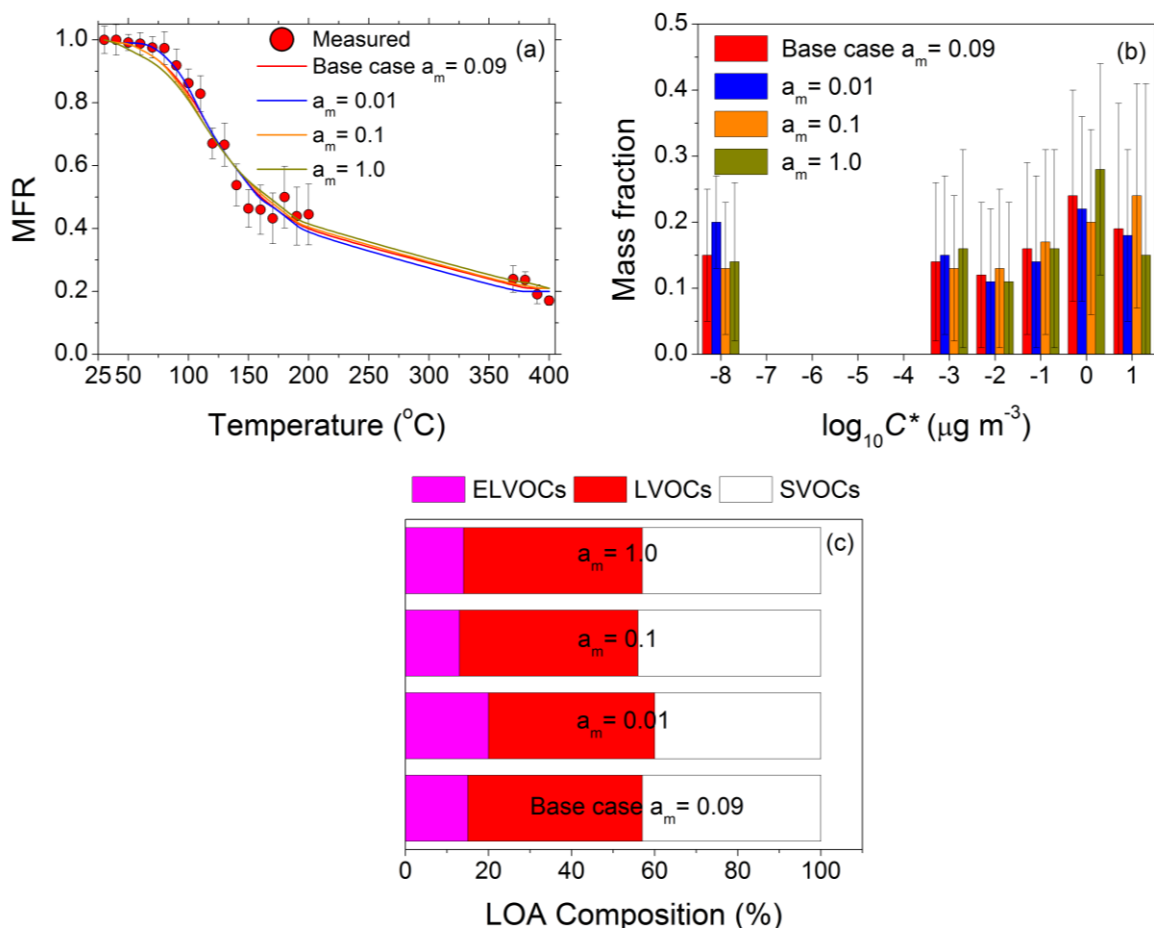

**Figure S6:** (a) Measured (red circles) and predicted thermograms for the base case (red line),  $a_m=0.01$  (blue line),  $a_m=0.1$  (orange line), and  $a_m=1.0$  (dark yellow line) for LO-OOA FAME-16 according to the model of Karnezi et al. (2014). The error bars represent  $\pm 2$  standard deviations of the mean. (b) Estimated LO-OOA volatility distributions for the base case and the sensitivity tests to different  $a_m$  values along with their corresponding uncertainties ( $\pm 1$  standard deviation of the mean) according to the model of Karnezi et al. (2014). (c) LO-OOA composition for the different  $a_m$  values. ELVOCs are in magenta, LVOCs in red and SVOCs in white.

## References

- Burtscher, H., Baltensperger, U., Bukowiecki, N., Cohn, P., Hüglin, C., Mohr, M., Matter, U., Nyeki, S., Schmatloch, V., Streit, N. and Weingartner, E.: Separation of volatile and non-volatile aerosol fractions by thermodesorption: Instrumental development and applications, *J. Aerosol Sci.*, 32, 427–442, 2001.



- Florou, K., Liangou, A., Louvaris, E., Kaltsonoudis, C., Tasoglou, A., Patoulias, D., Kouvarakis, G., Vlachou, A., Kourtchev, I. and Spyros N. Pandis, S. N.; The Finokalia Aerosol Measurement Experiment (FAME-16): Atmospheric processing of organic aerosol in the Eastern Mediterranean, in prep.
- Hildebrandt, L., Engelhart, G. J., Mohr, C., Kostenidou, E., Lanz, V. A., Bougiatioti, A., DeCarlo, P. F., Prévôt, A. S. H., Baltensperger, U., Mihalopoulos, N., Donahue, N. M., and Pandis, S. N.: Aged organic aerosol in the eastern Mediterranean: The Finokalia aerosol measurement experiment 2008, *Atmos. Chem. Phys.*, 10, 4167–4186, 2010.
- Karnezi, E., Riipinen, I., and Pandis, S. N.: Measuring the atmospheric organic aerosol volatility distribution: a theoretical analysis, *Atmos. Meas. Tech.*, 7, 2953–2965, doi:10.5194/amt7-2953-2014, 2014.
- Kostenidou, E., Lee, B. H., Engelhart, G. J., Pierce, J. R. and Pandis, S. N.: Mass spectra deconvolution of low, medium, and high volatility biogenic secondary organic aerosol, *Environ. Sci. Technol.*, 43, 4884–4889, 2009.
- Kostenidou, E., Pathak, R. K., and Pandis, S. N.: An algorithm for the calculation of secondary organic aerosol density combining AMS and SMPS data, *Aerosol Sci. Tech.*, 41, 1002–1010, 2007.
- Louvaris, E.E., Florou, K., Karnezi, E., Papanastasiou, D.K., Gkatzelis, G.I., and Pandis, S.N.: Volatility of source apportioned wintertime organic aerosol in the city of Athens, *Atmos. Environ.*, 158, 138–147, 2017.
